# Supplementary material
Source: PubMed Central journal article supplement (PMC5621518)
Supplement: NIHMS838626-supplement-Supp_Info.pdf [file NIHMS838626-supplement-Supp_Info.pdf]

# Supplementary Information Inventory

## **Metabolic gatekeeper function of B-lymphoid transcription factors**

Lai N. Chan, Zhengshan Chen, Daniel Braas, Jae-Woong Lee, Gang Xiao, Huimin Geng, Kadriye Nehir Cosgun, Christian Hurtz, Seyedmehdi Shojaee, Valeria Cazzaniga, Hilde Schjerven, Thomas Ernst, Andreas Hochhaus, Steven M. Kornblau, Marina Konopleva, Miles A. Pufall, Giovanni Cazzaniga, Grace J. Liu, Thomas A. Milne, H. Philip Koeffler, Theodora S. Ross, Isidro Sanchez-Garcia, Arndt Borkhardt, Keith R. Yamamoto, Ross A. Dickins, Thomas G. Graeber & Markus Müschen

- Supplementary Figure 1 (Gel Scans)
- Supplemental Tables S1-S10

**Figure 1a**

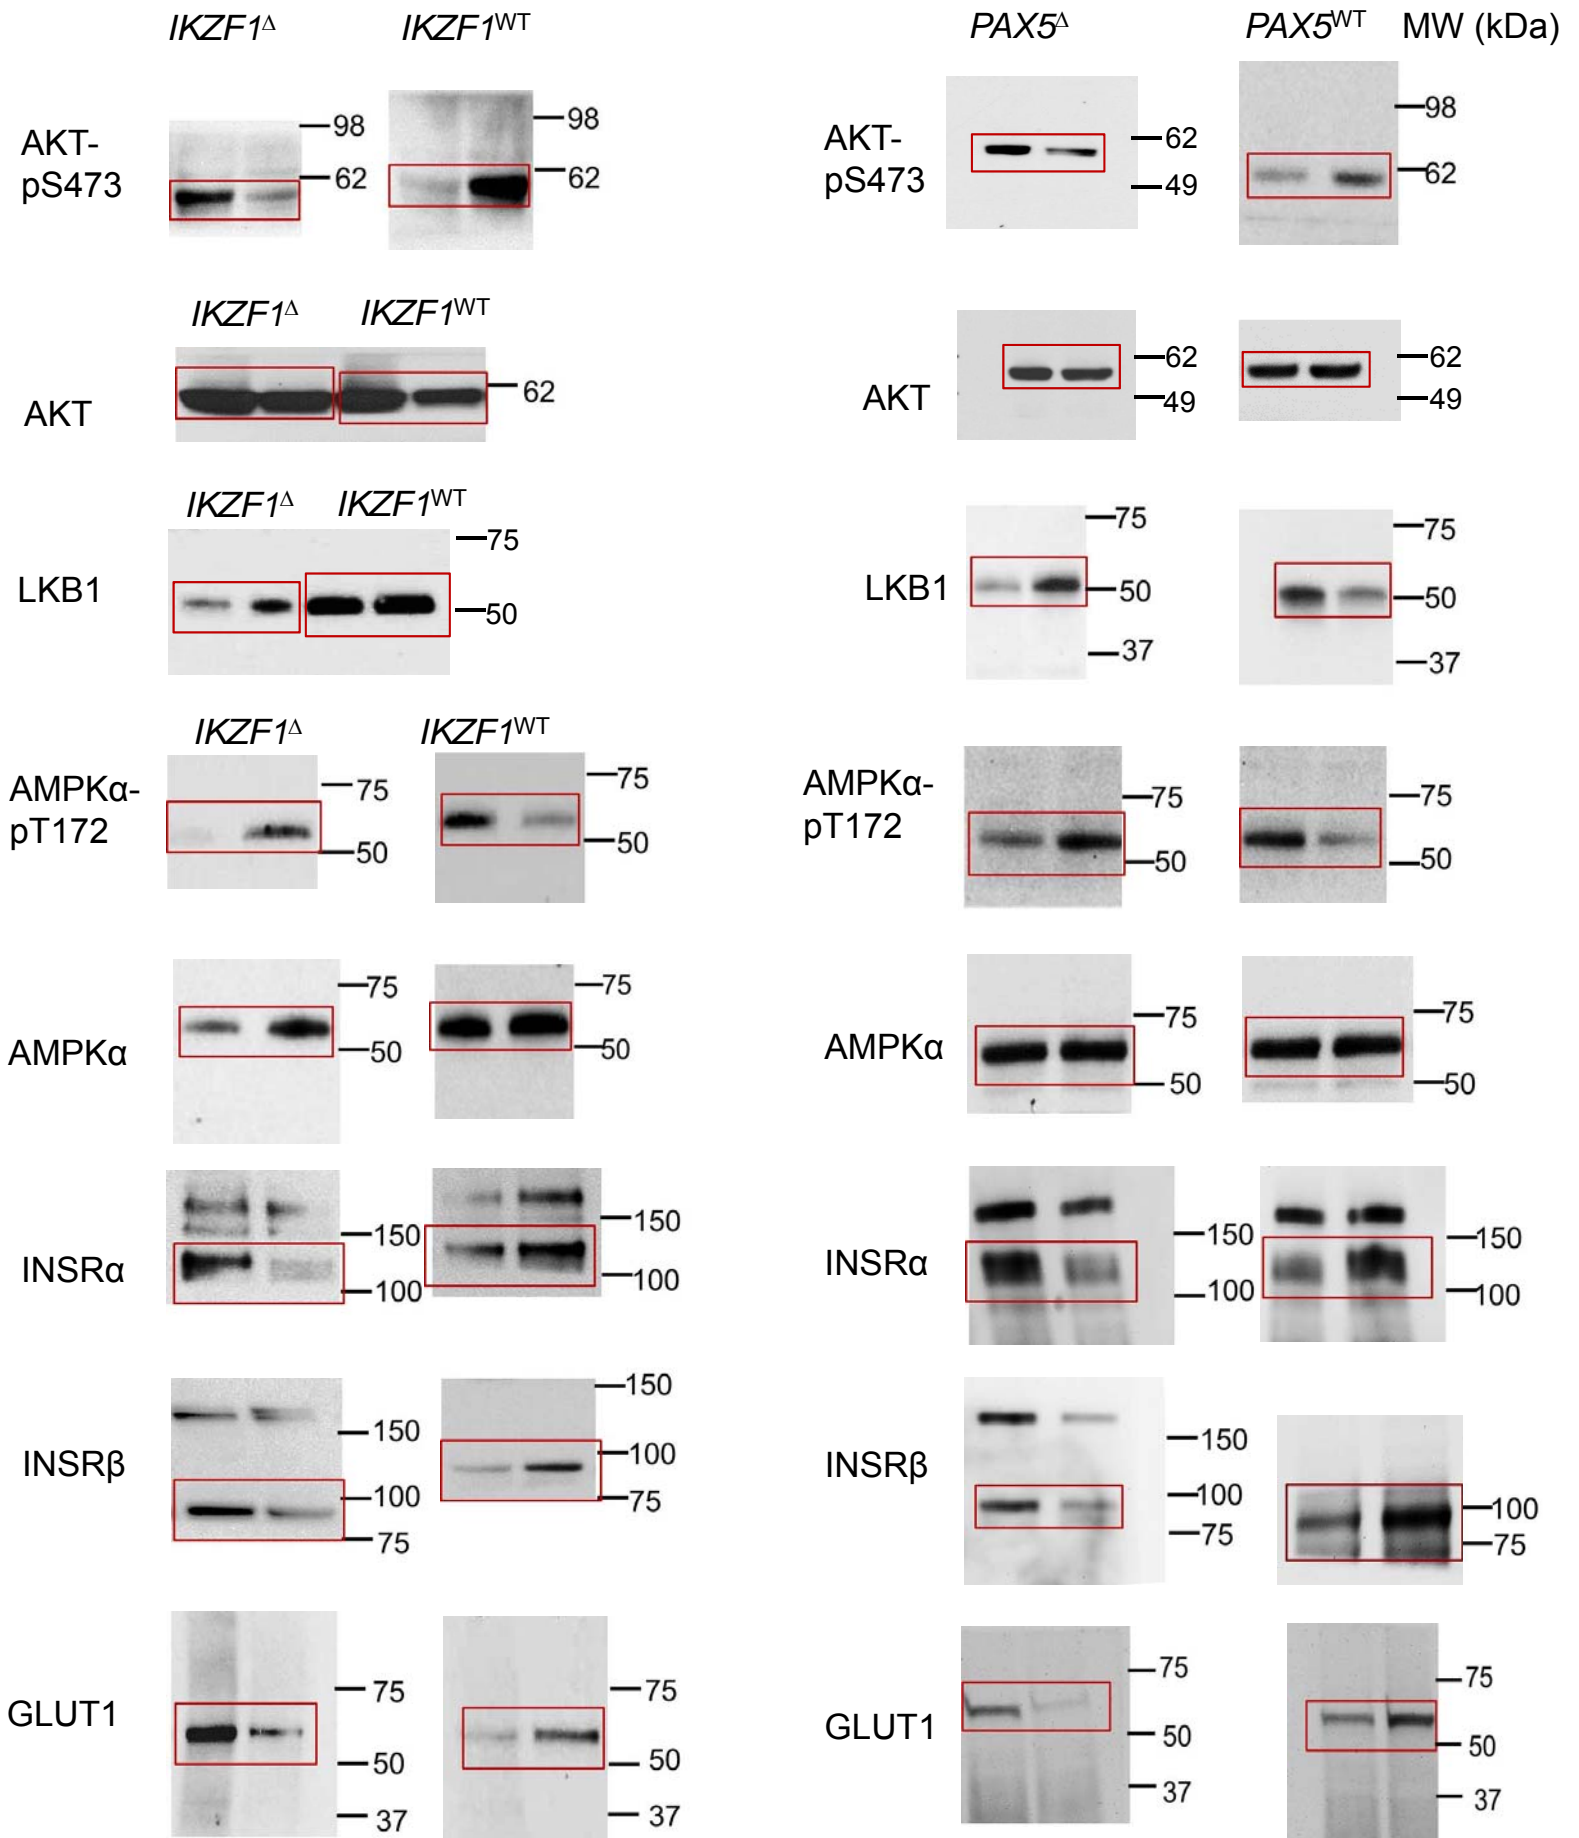

Figure 1a, continued

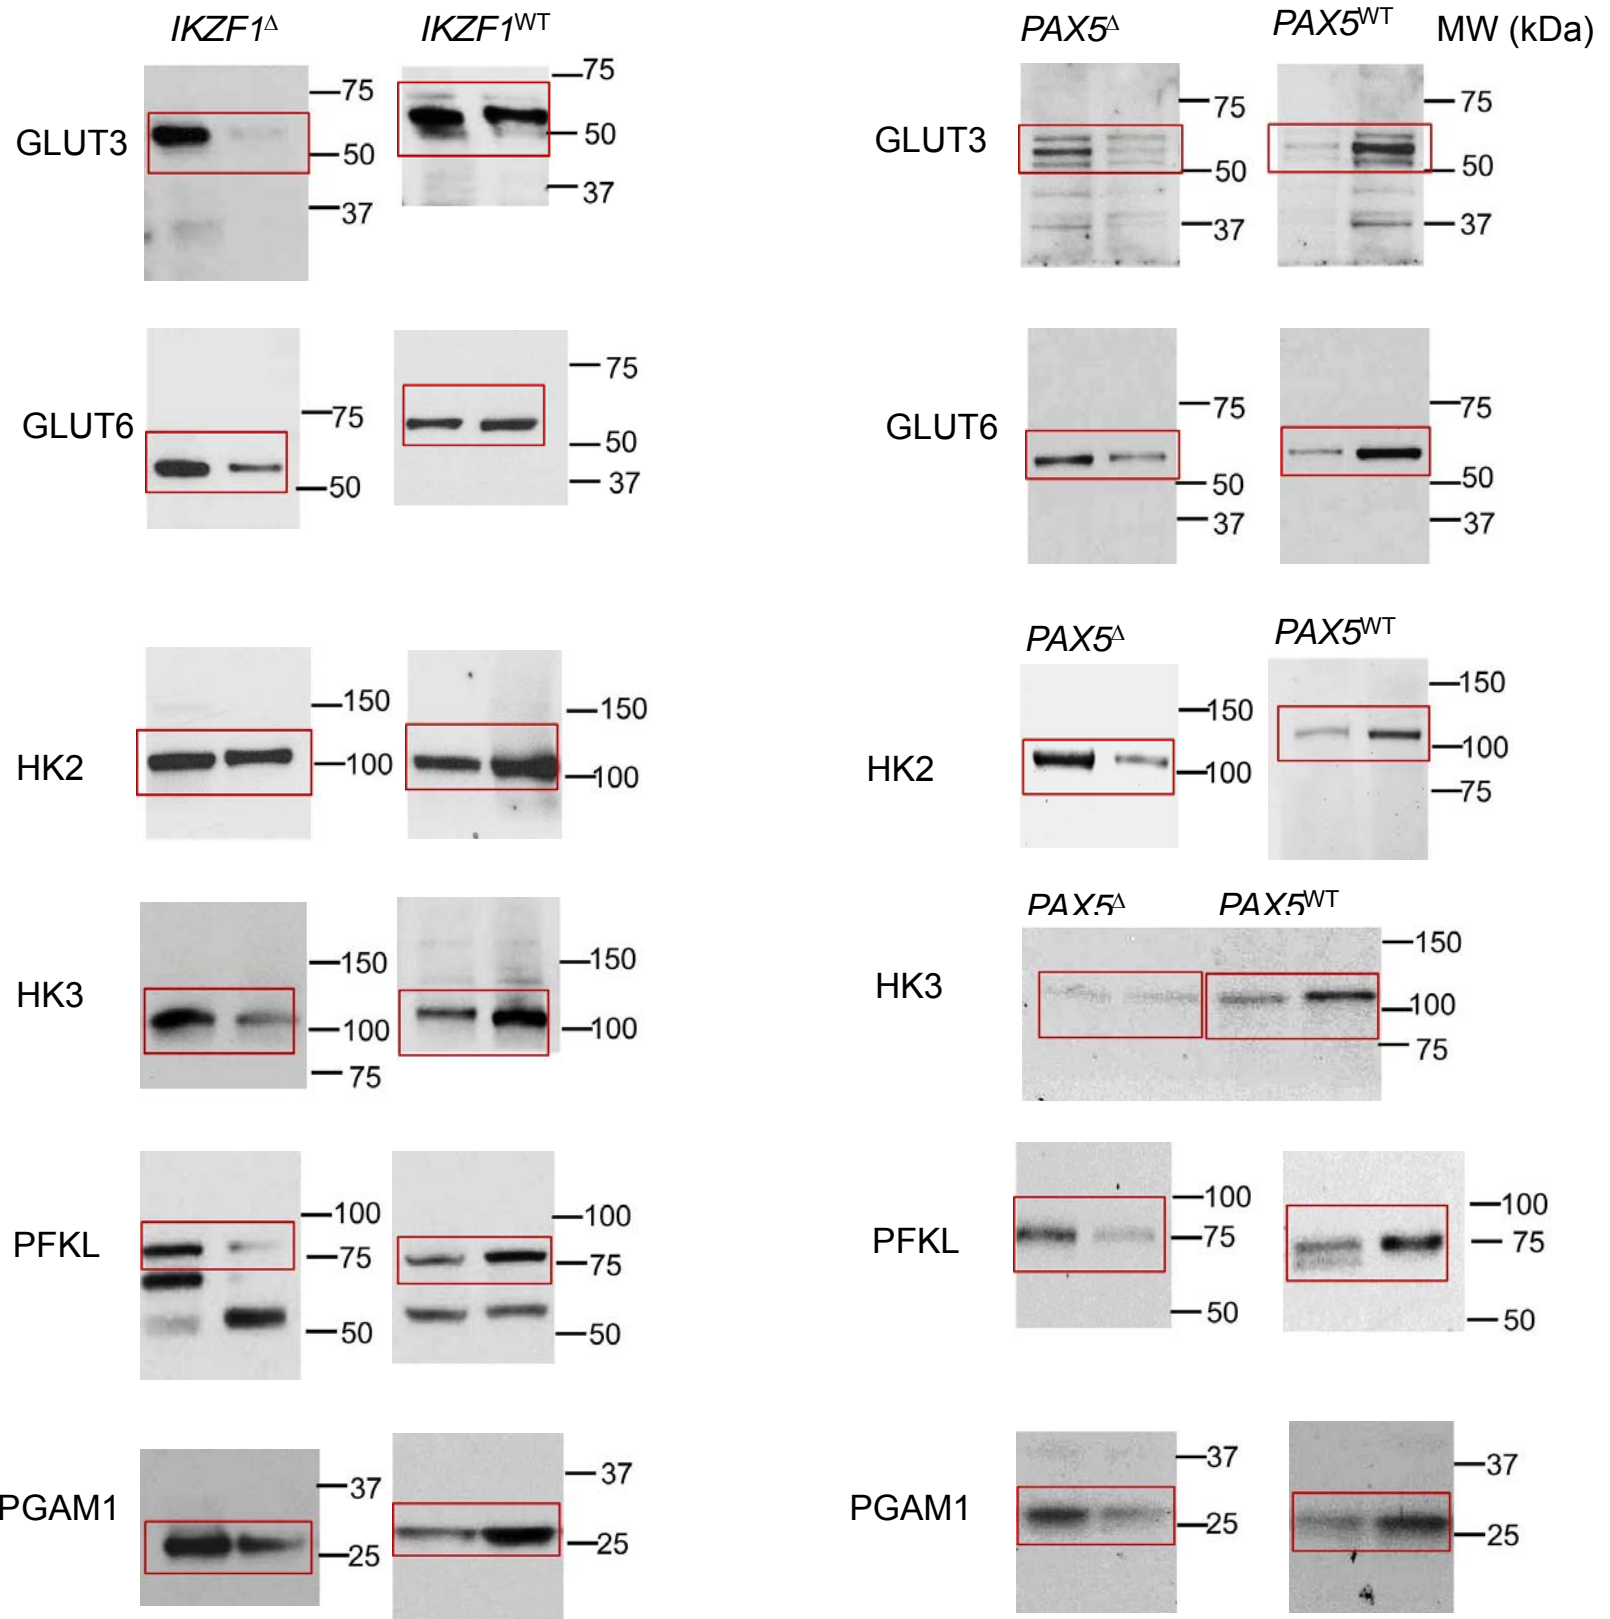

Figure 1a, continued

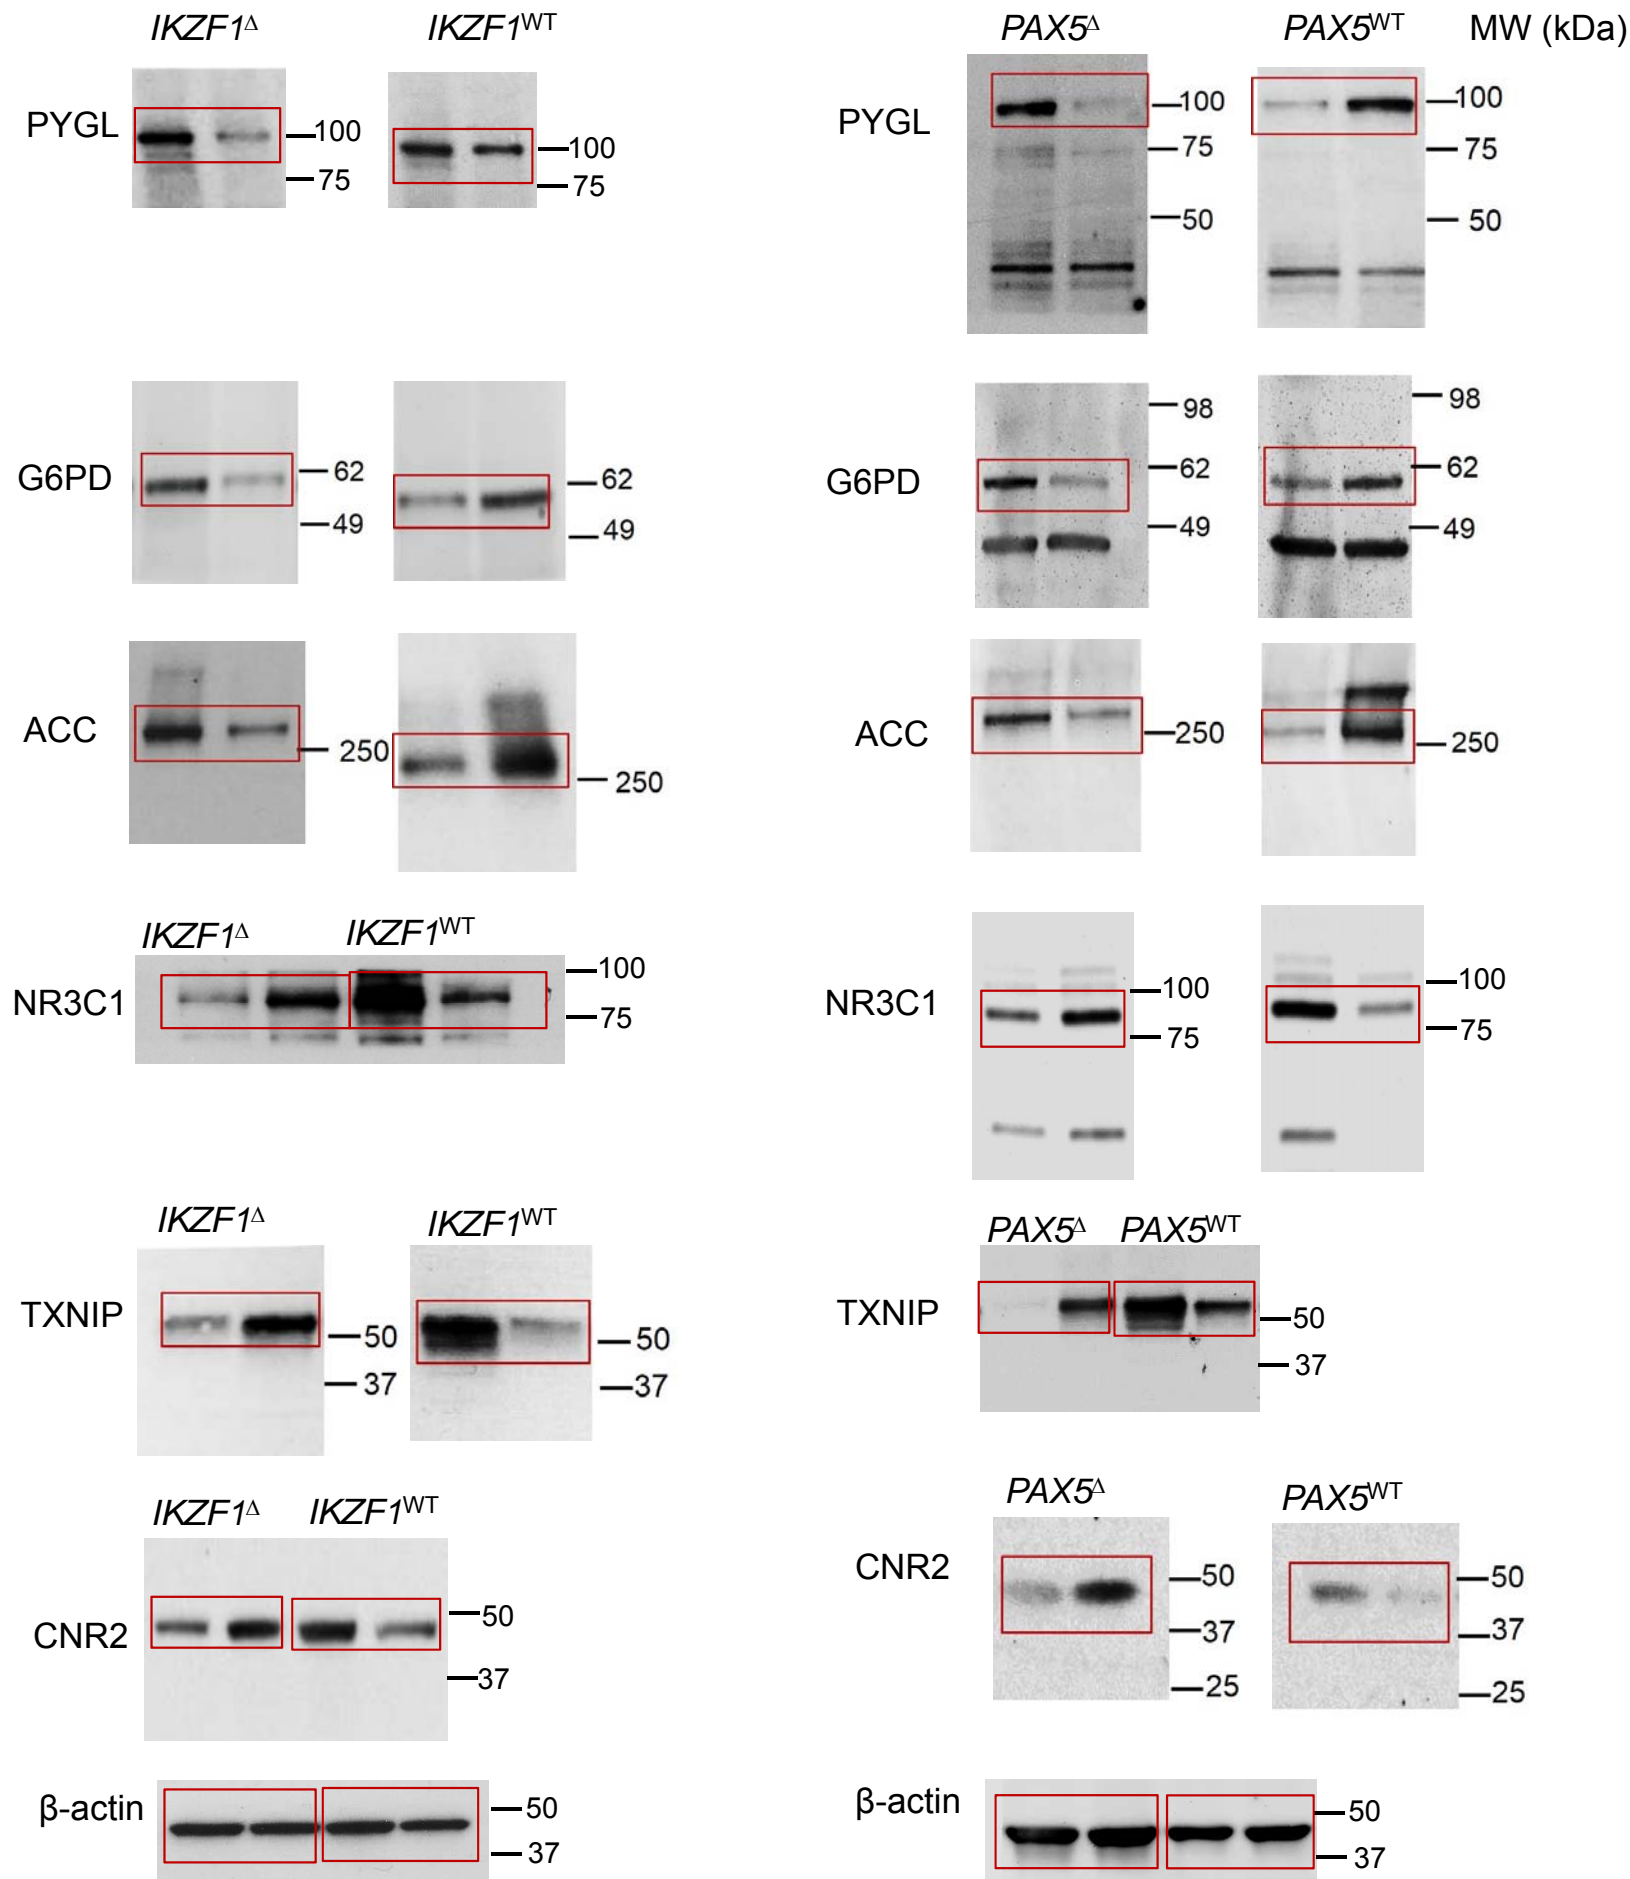

**Figure 2b**

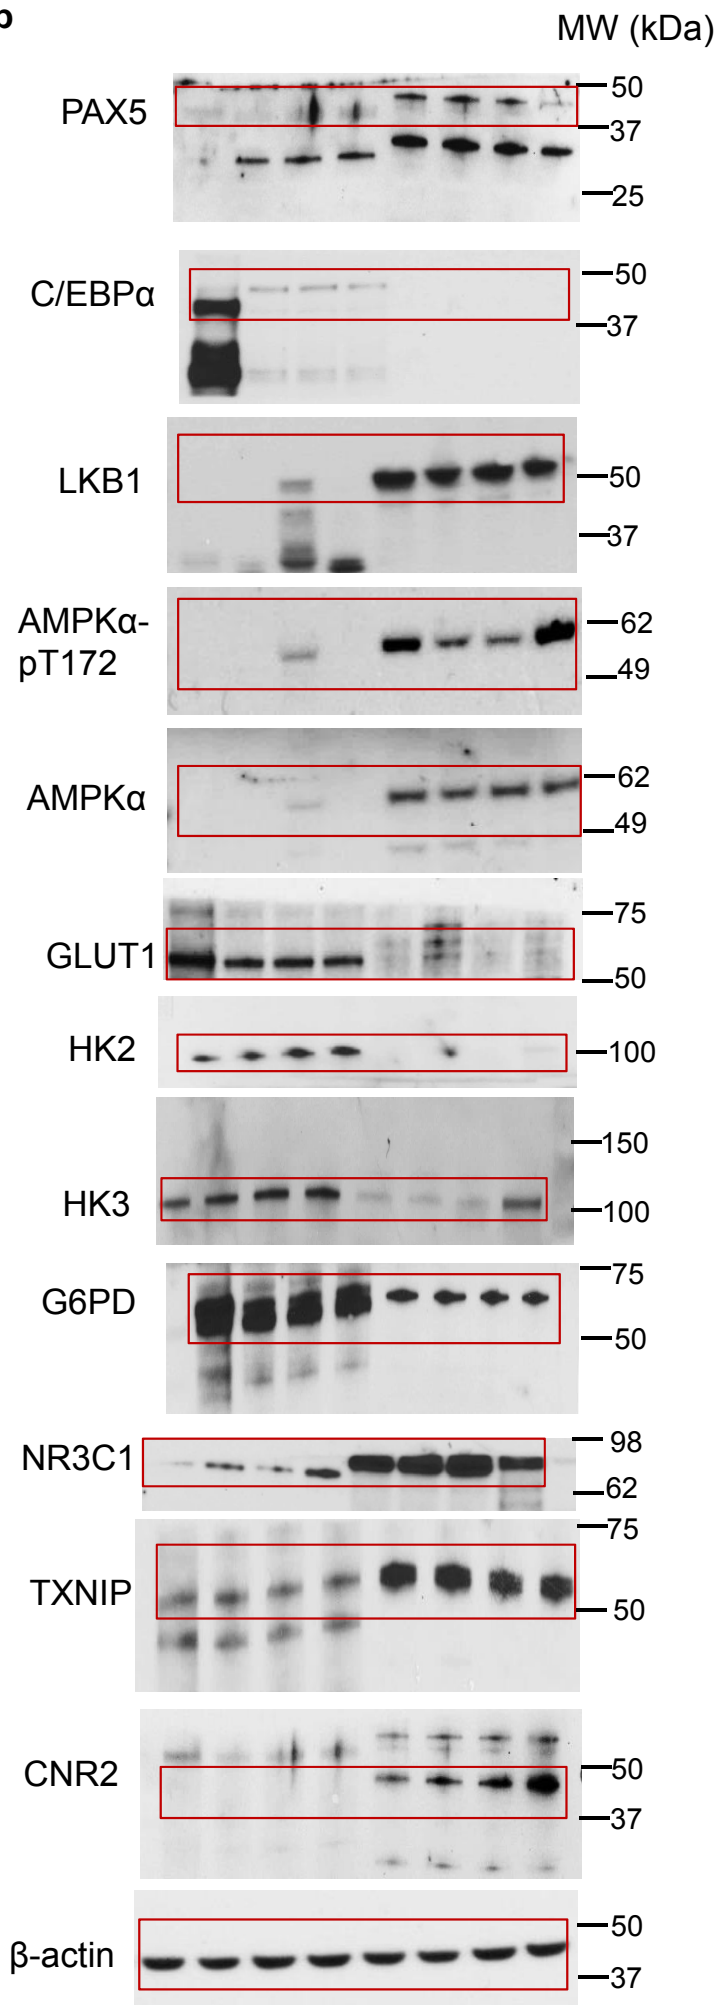

**Figure 3c**

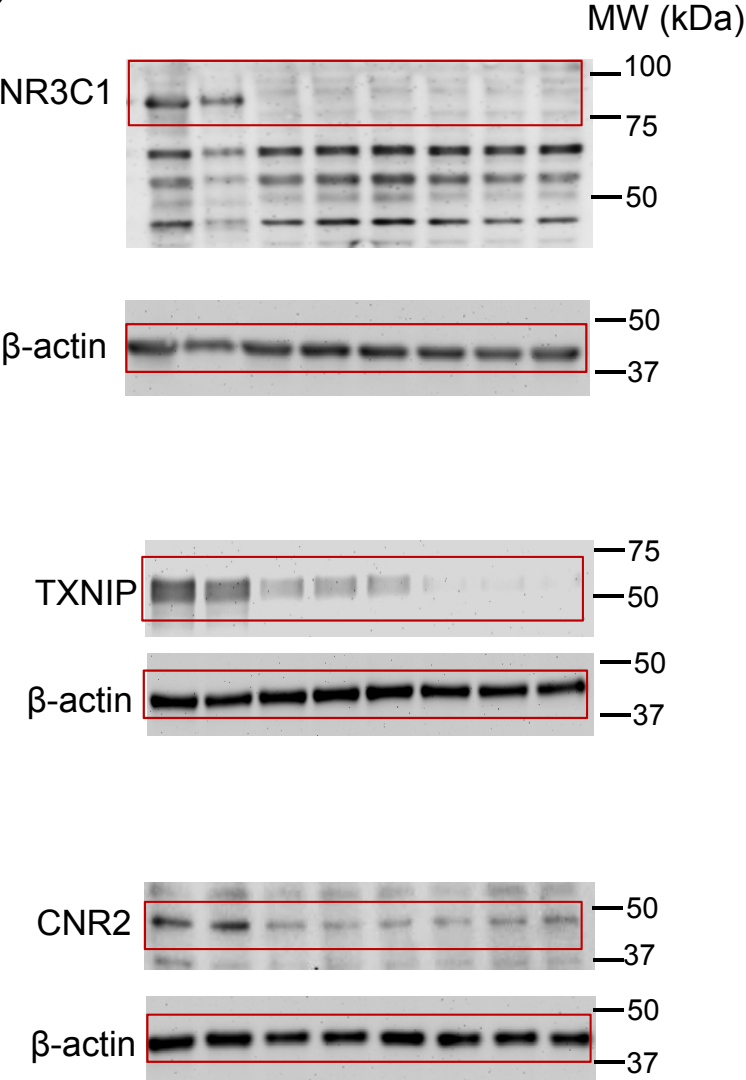

**Figure 4c.**

MW (kDa)

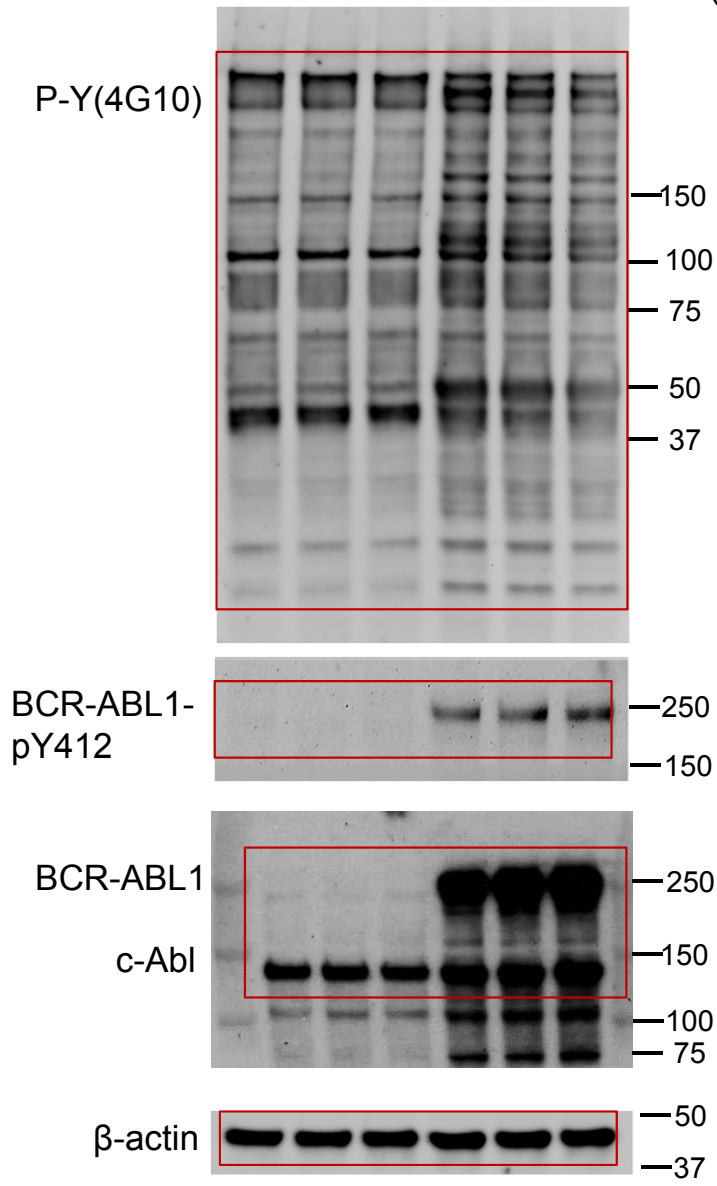





## Extended Data Figure 2a

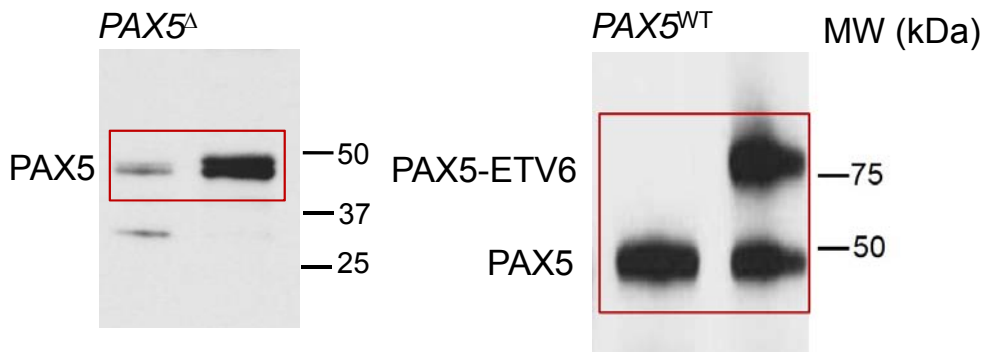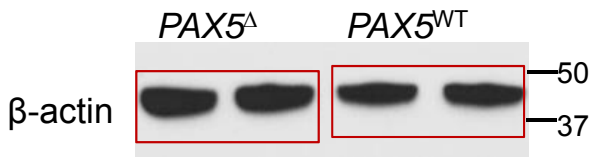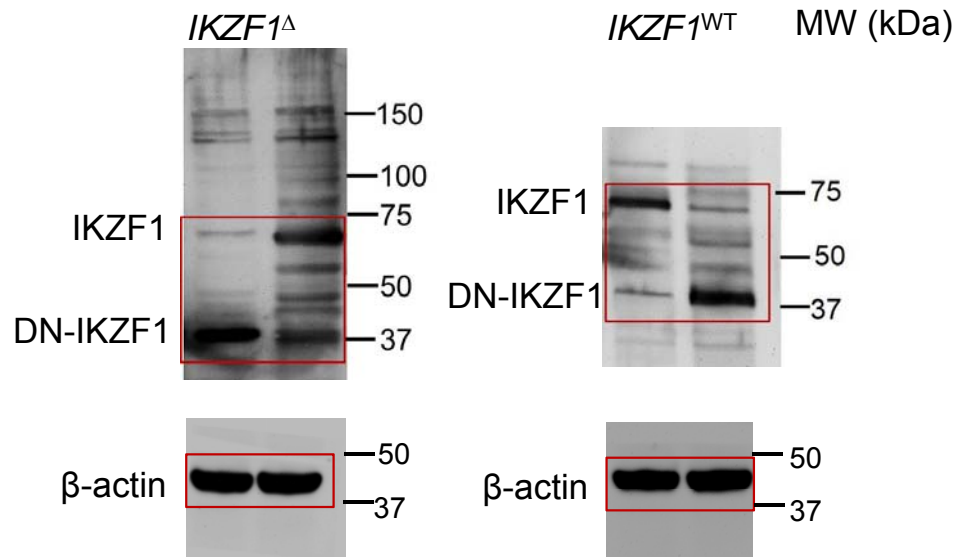

Extended Data Figure 3d.

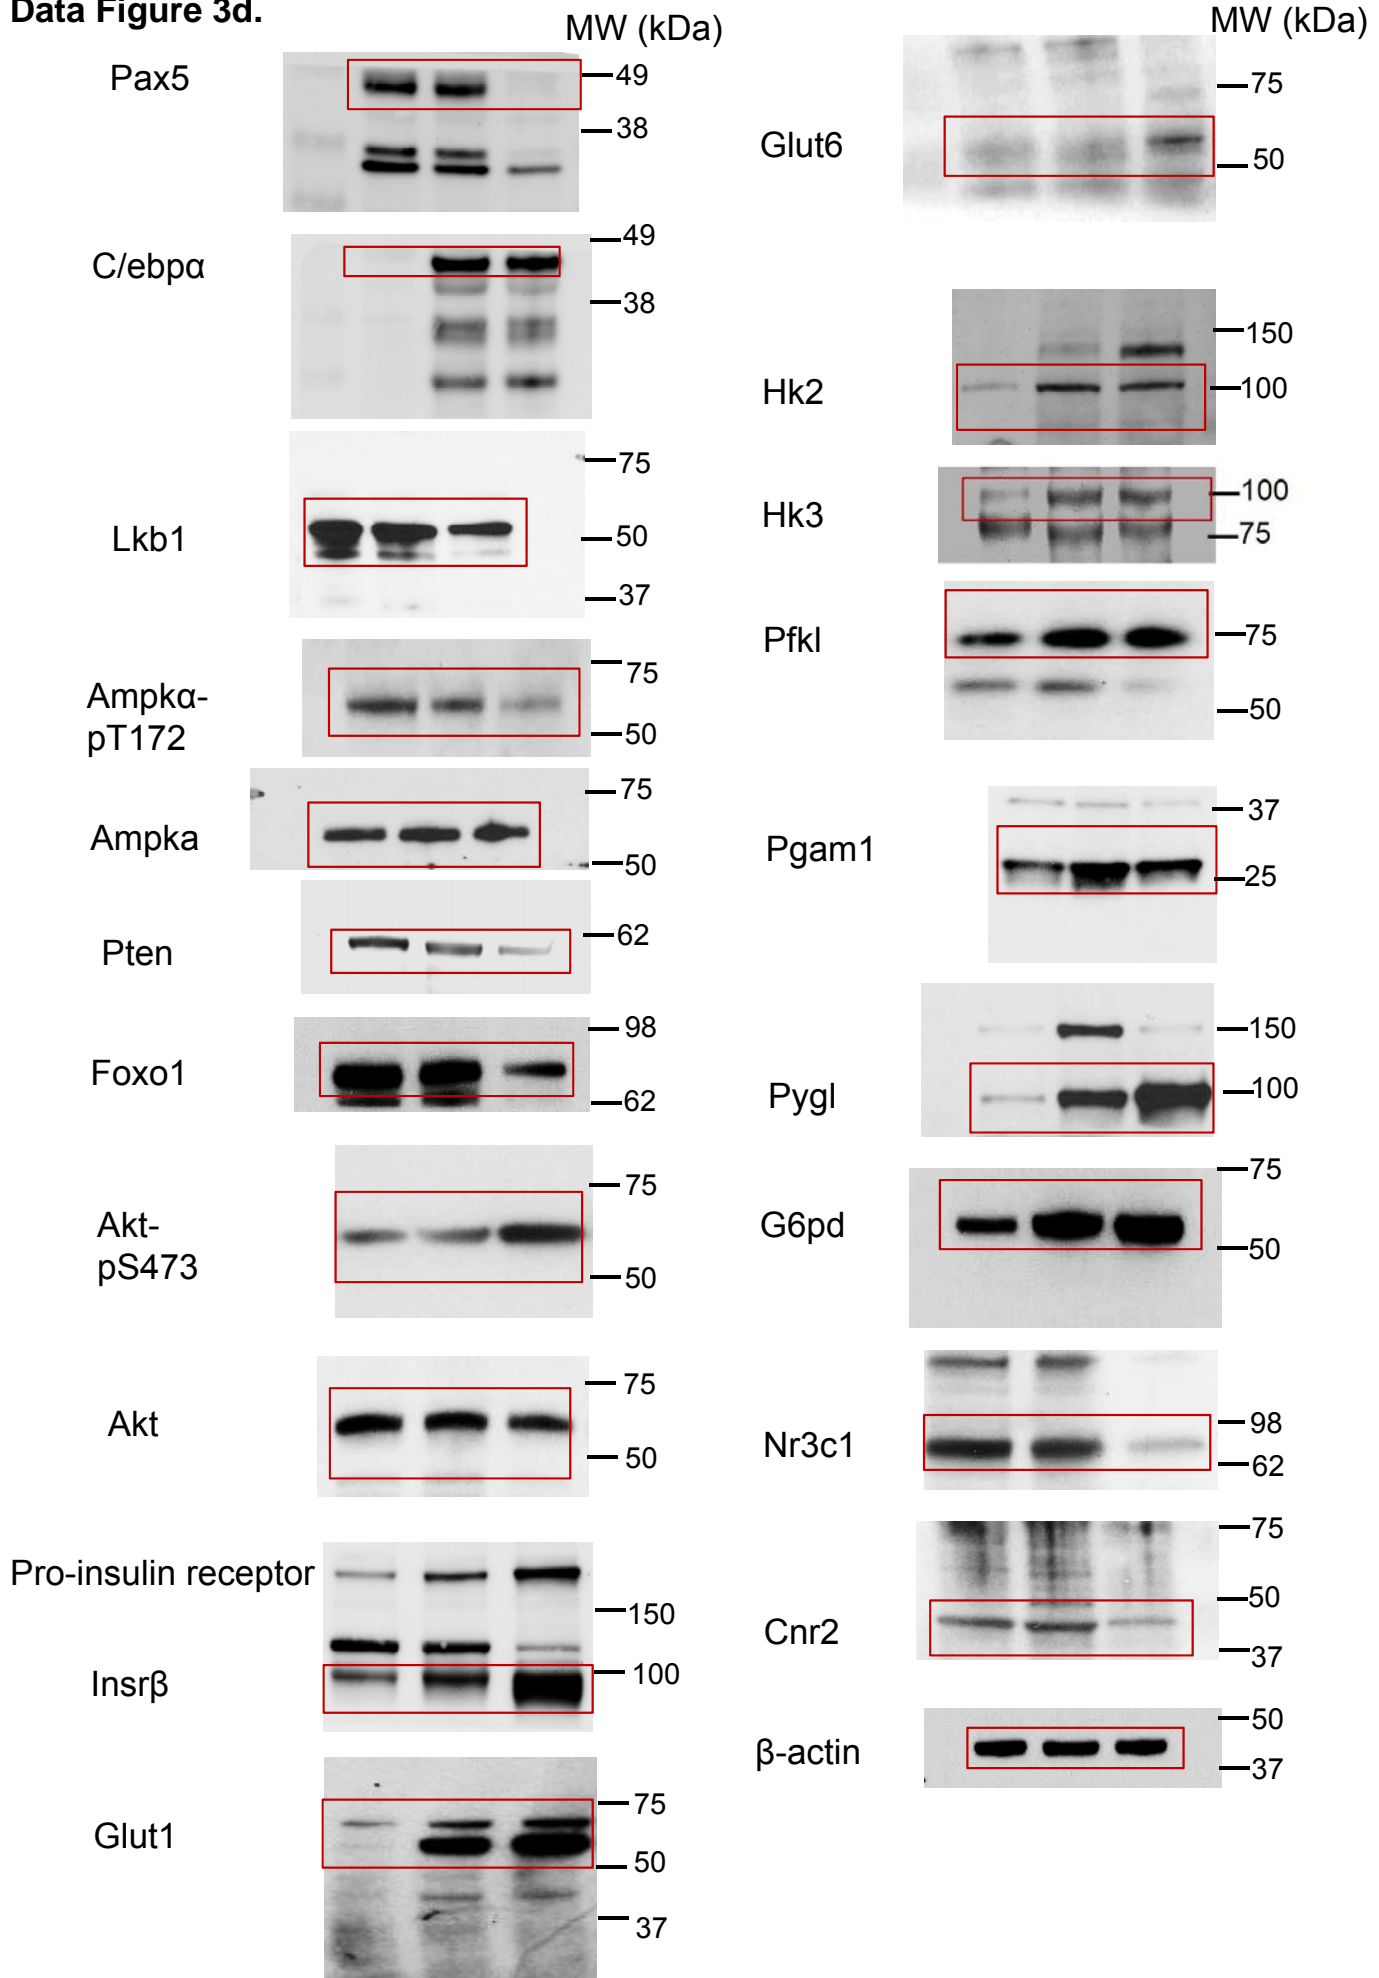

### Extended Data Figure 4b.

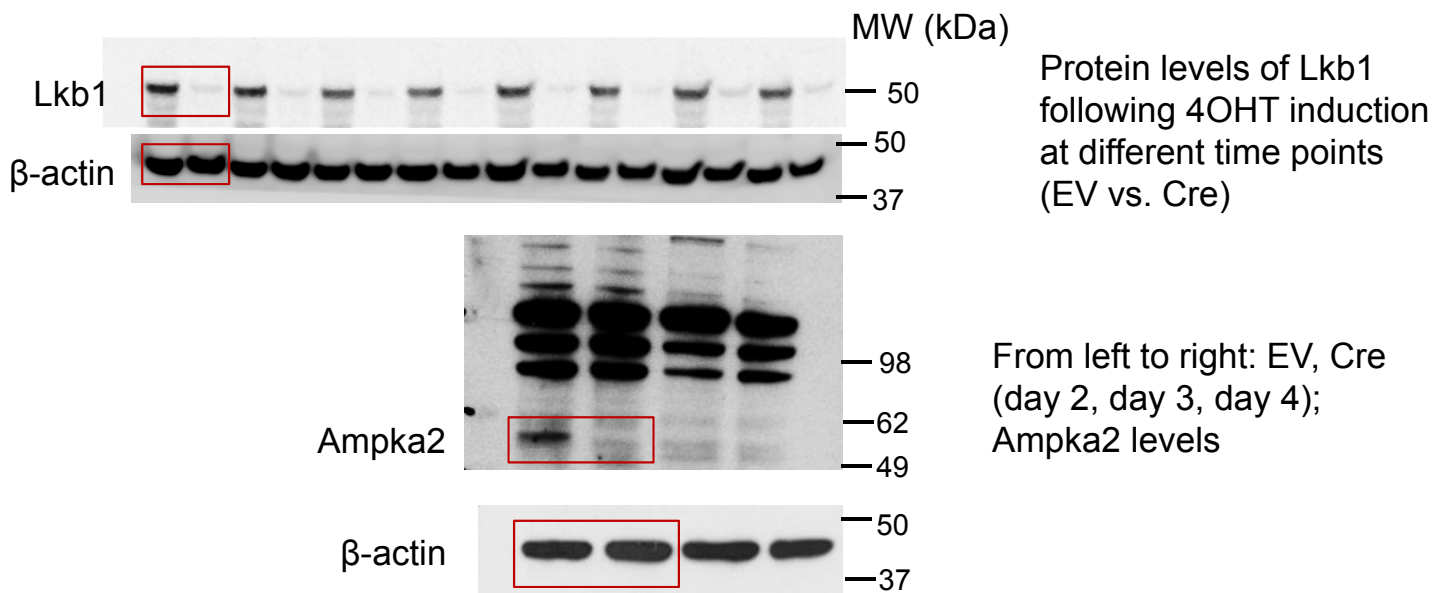

### Extended Data Figure 4i.

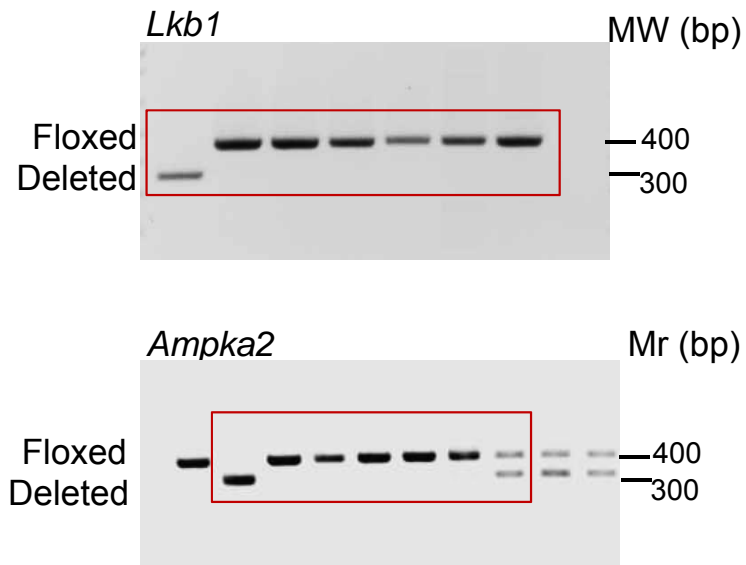

Extended Data Figure 6b.

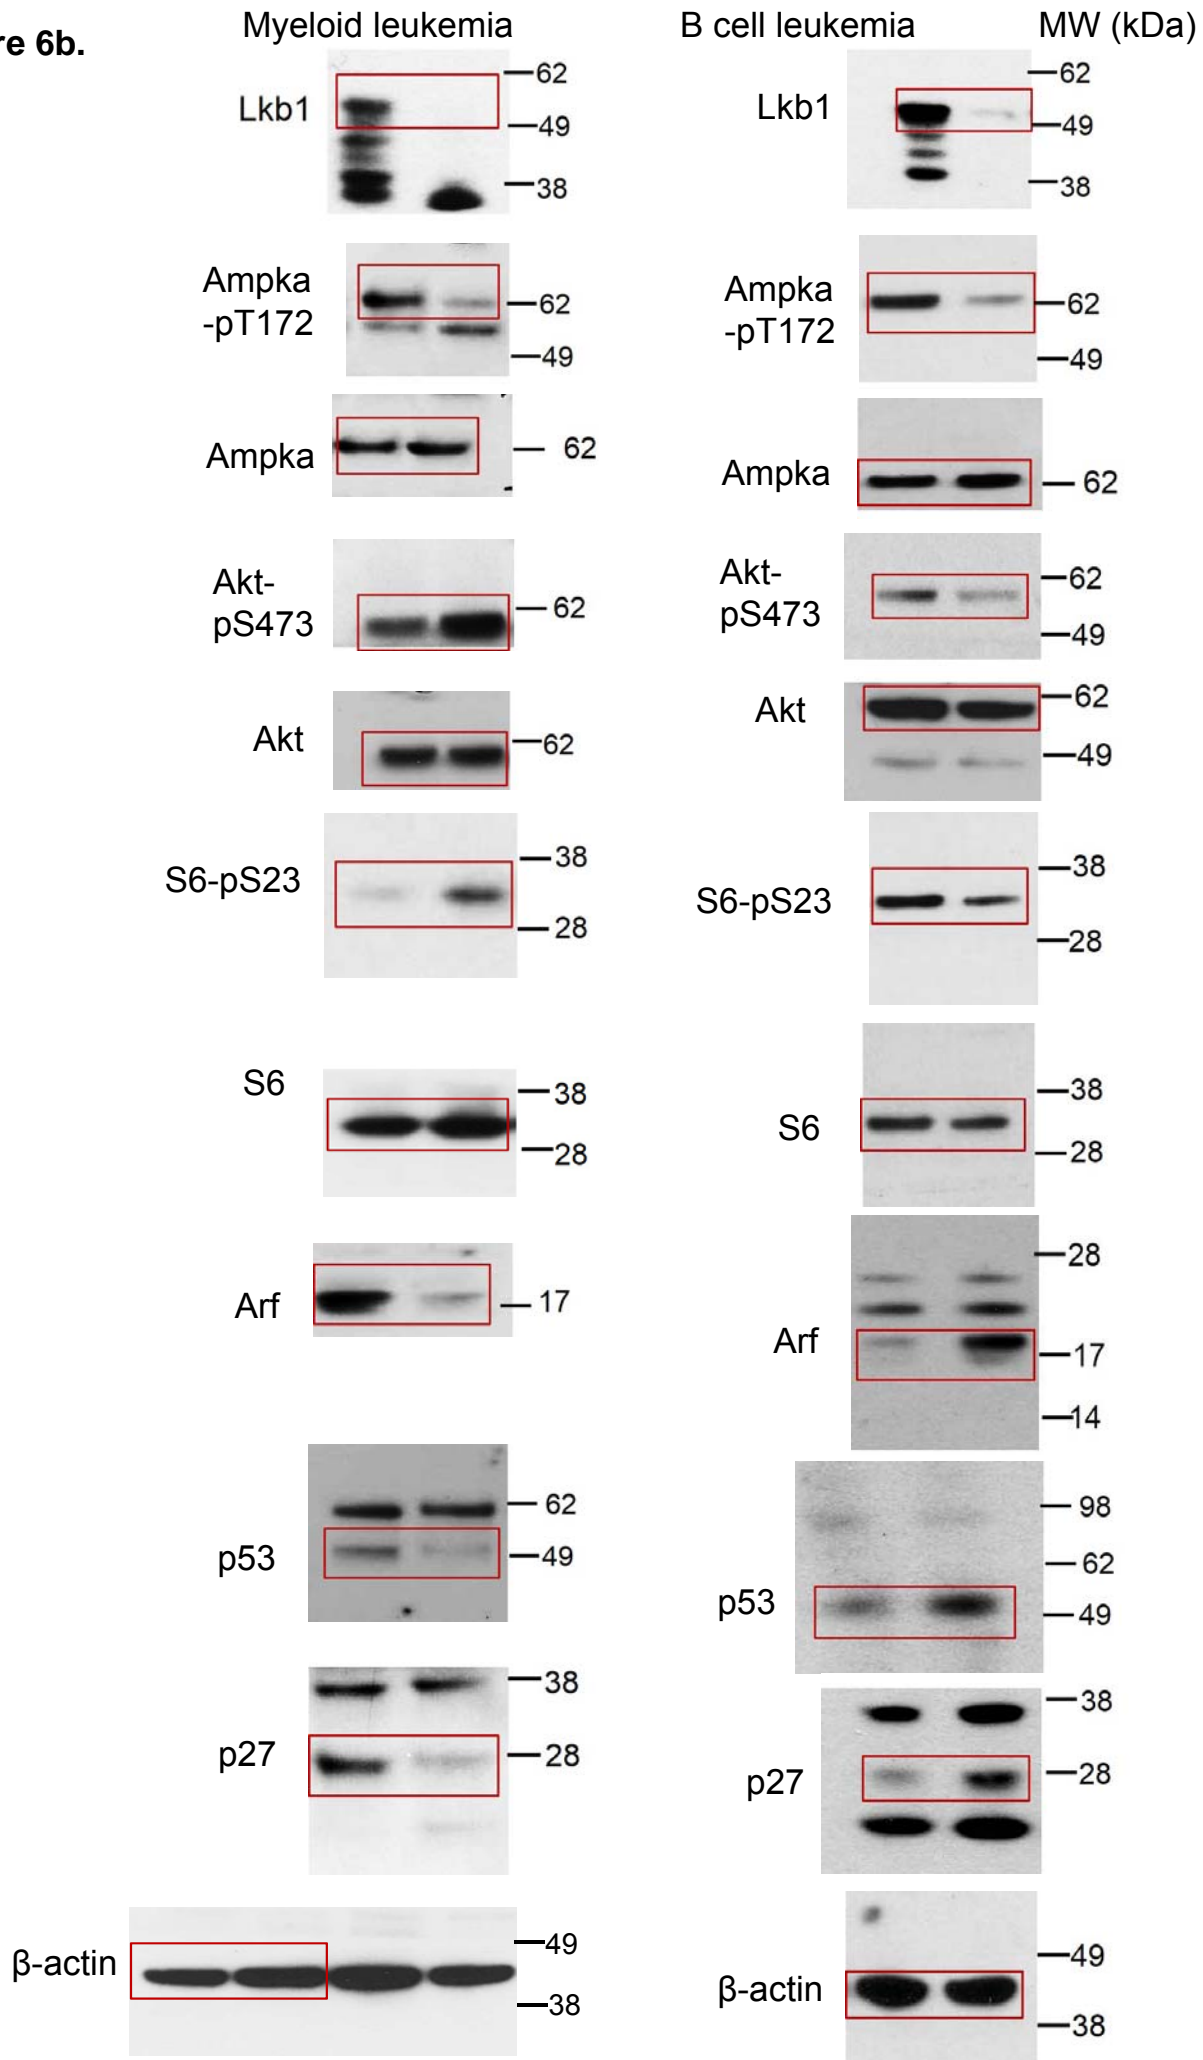

# Extended Data Figure 7d.

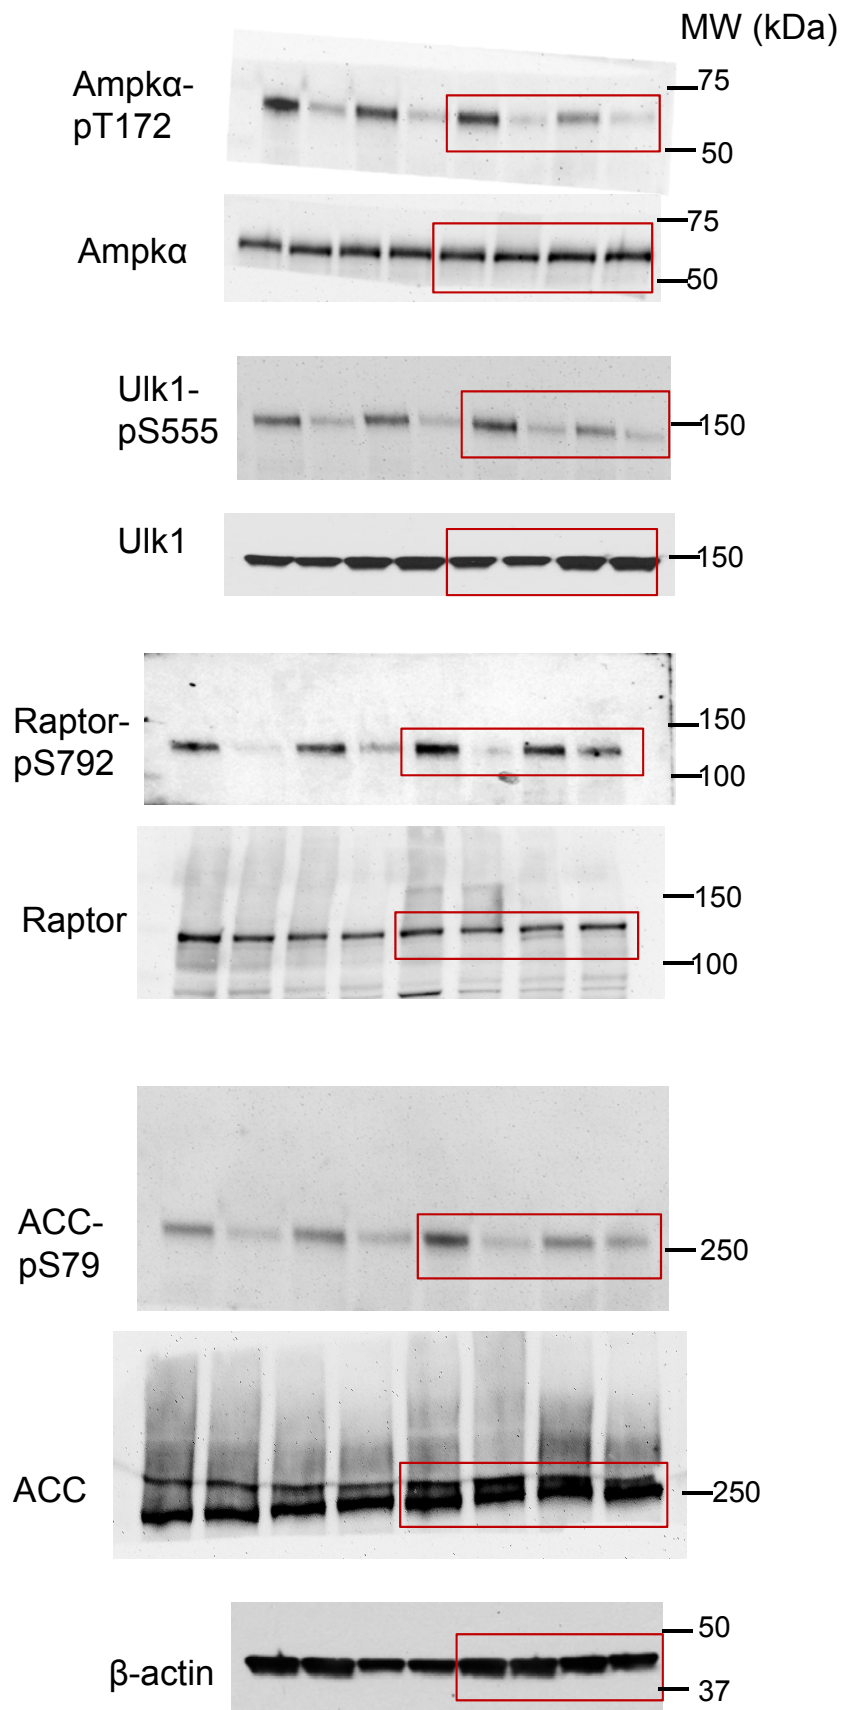

Extended Data Figure 8c.

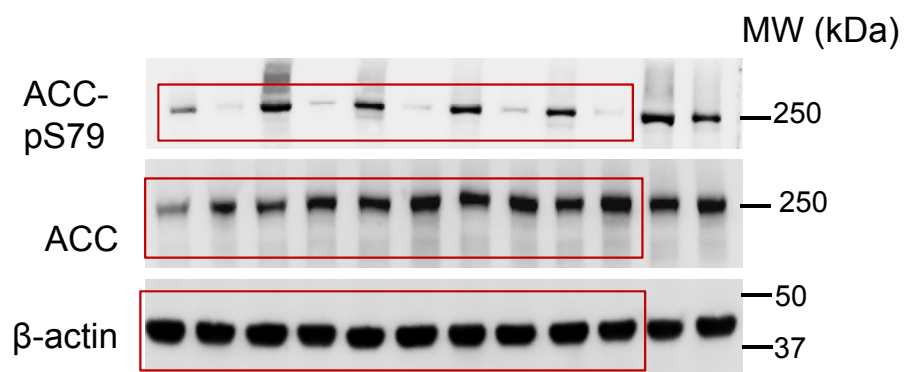

Extended Data Figure 8d.

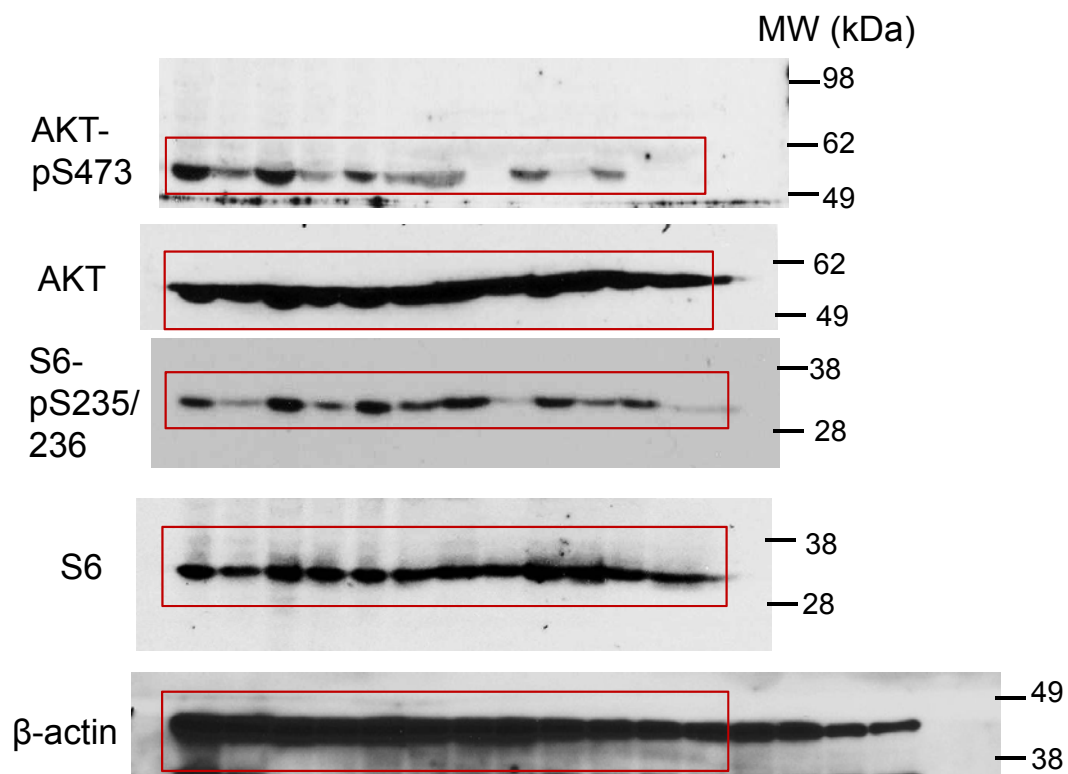

Extended Data Figure 9d.

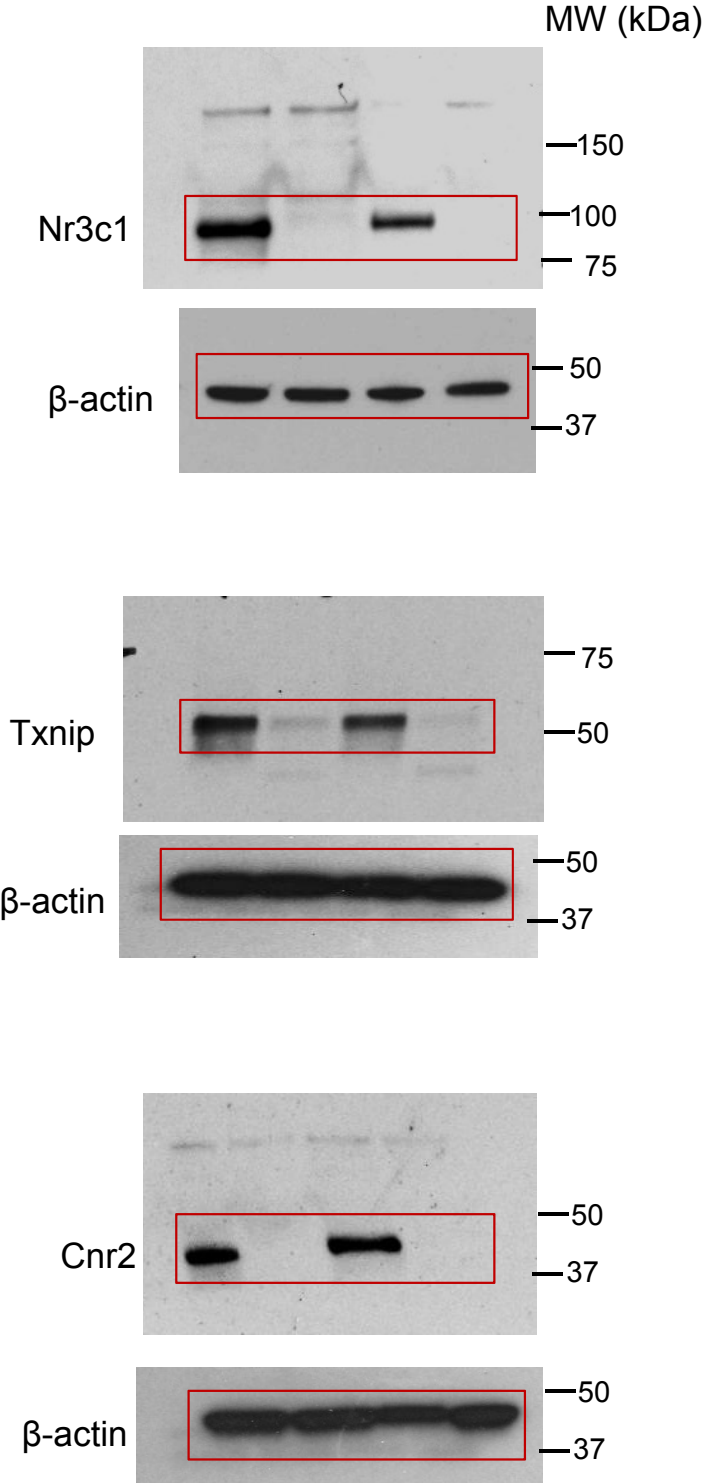

## SUPPLEMENTARY TABLES

**Table S1:** *Combination index values obtained from combination drug treatments in patient-derived samples*

| pre-B ALL cases | Drug Combination      | Combination Index (CI) values at |                  |                  | Average CI |
|-----------------|-----------------------|----------------------------------|------------------|------------------|------------|
|                 |                       | ED <sub>50</sub>                 | ED <sub>75</sub> | ED <sub>90</sub> |            |
| PDX2            | BML275+Prednisolone   | 0.501                            | 0.251            | 0.125            | 0.292      |
| LAX7            | BML275+Prednisolone   | 0.169                            | 0.405            | 0.971            | 0.515      |
| MXP4            | BML275+Prednisolone   | 0.178                            | 0.166            | 0.180            | 0.175      |
| LAX9            | BML275+Prednisolone   | 0.866                            | 0.127            | 0.128            | 0.374      |
| MXP2            | BML275+Prednisolone   | 0.0915                           | 0.0313           | 0.0146           | 0.0458     |
| PDX2            | BML275+Dex            | 0.572                            | 0.382            | 0.346            | 0.433      |
| LAX7            | BML275+Dex            | 0.351                            | 0.401            | 0.458            | 0.403      |
| MXP4            | BML275+Dex            | 0.264                            | 0.407            | 0.806            | 0.492      |
| LAX9            | BML275+Dex            | 0.0231                           | 0.0179           | 0.0202           | 0.0204     |
| MXP2            | BML275+Dex            | 0.362                            | 0.470            | 0.620            | 0.484      |
| PDX2            | HU308+Prednisolone    | 0.597                            | 0.677            | 0.669            | 0.648      |
| LAX7            | HU308+Prednisolone    | 0.475                            | 0.643            | 0.946            | 0.688      |
| MXP2            | HU308+Prednisolone    | 0.732                            | 0.779            | 0.863            | 0.791      |
| PDX2            | D-allose+Prednisolone | 0.520                            | 0.504            | 0.490            | 0.505      |
| LAX7            | D-allose+Prednisolone | 0.483                            | 0.530            | 0.609            | 0.541      |
| MXP2            | D-allose+Prednisolone | 0.578                            | 0.523            | 0.492            | 0.531      |
| PDX2            | 3-O-MG+Prednisolone   | 0.407                            | 0.423            | 0.454            | 0.428      |
| LAX7            | 3-O-MG+Prednisolone   | 0.385                            | 0.267            | 0.190            | 0.281      |
| MXP2            | 3-O-MG+Prednisolone   | 0.739                            | 0.844            | 0.971            | 0.851      |

**Notes:** Patient-derived pre-B ALL cells were treated with the indicated drug combination for 72 hr. Relative viability was measured by CCK-8 assays. Combination index (CI) values were calculated using the CalcuSyn software.



**Table S2: Overview of patient-derived pre-B ALL samples studied**

| Case  | Cytogenetics                | Oncogene                                                 | Clinical course    | Gener/Age |
|-------|-----------------------------|----------------------------------------------------------|--------------------|-----------|
| LAX2  | t(9;22)(q34;q11)            | <i>BCR-ABL1</i> ; p210, T315I                            | Relapse (Imatinib) | m/38      |
| BLQ5  | FISH der(9),der(22)         | <i>BCR-ABL1</i> ; p190, T315I                            | Relapse (Imatinib) | f         |
| LAX9  | t(9;22)(q34;q11)            | <i>BCR-ABL1</i> ; p190                                   | at diagnosis       | m         |
| ICN1  | t(9;22)(q34;q11)            | <i>BCR-ABL1</i> ; p210                                   | at diagnosis       |           |
| PDX2  | der(9)(q10)t(9;22)(q34;q11) | <i>BCR-ABL1</i>                                          | at diagnosis       | f/52      |
| MXP2  | t(9;22)(q34;q11)            | <i>BCR-ABL1</i> ; p190; <i>PAX5</i> deletion             | at diagnosis       | 6         |
| MXP4  | t(9;22)(q34;q11)            | <i>BCR-ABL1</i> ; p210; <i>PAX5</i> deletion             | at diagnosis       | 14        |
| MXP9  |                             | <i>PAX5</i> deletion (exons 2-6)                         | at diagnosis       | f/2       |
| MXP5  | t(9;22)(q34;q11)            | <i>BCR-ABL1</i> ; p190; <i>PAX5</i> deletion (exons 2-6) | at diagnosis       | m/5       |
| LAX7  |                             |                                                          | at diagnosis       | m         |
| LAX7R |                             | <i>KRAS</i> <sup>G12V</sup>                              | Relapse            | m         |
| BLQ1  | FISH der(9), der(22)        | <i>BCR-ABL1</i> ; p210, T315I                            | Relapse (Imatinib) |           |
| BLQ11 | FISH der(9), der(22)        | <i>BCR-ABL1</i> ; p210, T315I                            | Relapse (Imatinib) | m         |
| PDX59 | 46,XY, t(9;22)(q34;q11.2)   | <i>BCR-ABL1</i>                                          |                    | m/6       |

**Notes:** All primary samples are bone marrow biopsies, blast content >80%; LAX, Los Angeles; BLQ, Bologna; TXL, Berlin; ICN, Seoul; PDX, Portland; MXP, Milan; f, female; m, male. All cells were mycoplasma-free.

| Cell line  | Type                 | Genetic lesion                                                                         |
|------------|----------------------|----------------------------------------------------------------------------------------|
| MHH-PREB-1 | Burkitt lymphoma     | t(8;14) <i>MYC-IGH</i> alteration, hyperdiploidy                                       |
| L1236      | Hodgkin's lymphoma   | Hypotriploid karyotype with 17% polyploidy; <i>BCL6</i> mutation                       |
| KM-H2      | Hodgkin's lymphoma   | Amplifications: <i>CCND2</i> , <i>FGFR3/MMSET</i> , <i>JAK2</i> ; <i>BCL6</i> mutation |
| JEKO-1     | Mantle cell lymphoma | <i>MYC</i> amplification, <i>P16INK4A</i> deletion                                     |

**Notes:** All cells were mycoplasma-free.

**Table S3: Overview of patient-derived chronic myeloid leukemia cases studied**

| Patient | Age at Dx | Phase           | BCR-ABL1 Transcript | Cytogenetics                          | BCR-ABL1% (IS) at Dx | Prior therapy |
|---------|-----------|-----------------|---------------------|---------------------------------------|----------------------|---------------|
| CML1    | 55 (CP)   | Newly diagnosed |                     |                                       | 250                  | None          |
| CML2    | 29 (CP)   | Newly diagnosed |                     |                                       | 170                  | None          |
| CML3    | 60 (CP)   | Newly diagnosed | b2a2                |                                       |                      | None          |
| CML4    | 21 (CP)   | Newly diagnosed |                     |                                       | 51                   | None          |
| CML5    | 63 (CP)   | Newly diagnosed | b3a2                | 46,XY,t(9;22)(q34;q11),inv(1)(p13q21) |                      | None          |
| CML6    | 57 (CP)   | Newly diagnosed | b2a2                |                                       |                      | None          |
| CML7    | 59 (CP)   | Newly diagnosed | b2a2                | 46,XY,t(9;22)(q34;q11)                |                      | None          |
| CML8    | 42 (CP)   | After TKI       | b3a2                |                                       |                      | Nilotinib     |
| CML10   | 37 (CP)   | After TKI       | b3a2                |                                       |                      | Nilotinib     |

**Notes:** CP, chronic phase; Dx, diagnosis; IS, Minimal residual disease quantitative PCR results. All cells were mycoplasma-free.

**Table S4:** Overview of genetic mouse models studied

| Mouse strain                                           | Investigator                    | Purpose                                           |
|--------------------------------------------------------|---------------------------------|---------------------------------------------------|
| <sup>a</sup> <i>Stk11(Lkb1)<sup>fl/fl</sup></i>        | Sean Morrison, Dallas, TX       | Genetic loss-of-function experiments              |
| <sup>b</sup> <i>Prkaa2 (AMPKα2)<sup>fl/fl</sup></i>    | Sean Morrison, Dallas, TX       | Genetic loss-of-function experiments              |
| <sup>c</sup> <i>Nr3c1<sup>fl/fl</sup></i>              | Jonathan D. Ashwell, NCI        | Genetic loss-of-function experiments              |
| <sup>d</sup> <i>Txnip<sup>fl/fl</sup></i>              | Richard T. Lee, Boston, MA      | Genetic loss-of-function experiments              |
| <sup>e</sup> <i>Cnr2 (Cb2) KO</i>                      | Deltagen, Inc                   | Genetic loss-of-function experiments              |
| <sup>f</sup> <i>Vav-tTA x Tet<sup>off</sup>-shPax5</i> | Ross A. Dickins, Melbourne, AU  | Tet <sup>OFF</sup> -shPax5 transgenic mouse model |
| NOD/SCID                                               | Jackson Laboratories            | Transplant recipient mice                         |
| NSG                                                    | Jackson Laboratories            | Transplant recipient mice                         |
| <sup>g</sup> <i>Bcr<sup>+/LSL-BCR/ABL</sup></i>        | Theodora S. Ross, Dallas, TX    | Metabolite priming experiments                    |
| <sup>h</sup> <i>Mb1-Cre</i>                            | Michael Reth, Freiburg, Germany | Genetic loss-of-function experiments              |
| <sup>i</sup> <i>Cd21-Cre</i>                           | Klaus Rajewsky, Berlin, Germany | Genetic loss-of-function experiments              |

**References:**

- Nakada, D., Saunders, T.L., and Morrison, S.J. (2010) Lkb1 regulates cell cycle and energy metabolism in haematopoietic stem cells. *Nature* 468, 653-658.
- Saito, Y., Chapple, R.H., Lin, A., Kitano, A., and Nakada, D. (2015) AMPK protects leukemia-initiating cells in myeloid leukemias from metabolic stress in the bone marrow. *Cell Stem Cell* 17, 585-596.
- Mittelstadt, P.R., Monteiro, J.P., and Ashwell, J.D. (2012) Thymocyte responsiveness to endogenous glucocorticoids is required for immunological fitness. *J Clin. Invest.* 122, 2384-2394.
- Yoshioka, J., Imahashi, K., Gabel, S.A., Chutkow, W.A., Burds, A.A., Gannon, J., Schulze, P.C., MacGillivray, C., London, R.E., Murphy, E., and Lee, R.T. (2007) Targeted deletion of thioredoxin-interacting protein regulates cardiac dysfunction in response to pressure overload. *Circ. Res.* 101, 1328-1338.
- Pereira, J.P., An, J., Xu, Y., Huang, Y., and Cyster, J.S. (2009) Cannabinoid receptor 2 mediates the retention of immature B cells in bone marrow sinusoids. *Nat. Immunol.* 10, 403-411.
- Liu GJ, Cimmino L, Jude JG, Hu Y, Witkowski MT, McKenzie MD, Kartal-Kaess M, Best SA, Tuohey L, Liao Y, Shi W, Farrar MA, Nutt SL, Smyth GK, Zuber J, Dickins RA. (2014) Pax5 loss imposes a reversible differentiation block in B-progenitor acute lymphoblastic leukemia. *Genes Dev.* 28, 1337-1350.
- Foley, S.B., Hildenbrand, Z.L., Soyombo, A.A., Magee, J.A., Wu, Y., Oravec-Wilson, K.I., and Ross. T.S. (2013) Expression of BCR/ABL p210 from a knockin allele enhances bone marrow engraftment without inducing neoplasia. *Cell Rep.* 17, 51-60.
- Hobeika, E., Thiemann, S., Storch, B., Jumaa, H., Nielsen, P.J., Pelanda, R., and Reth, M. (2006). Testing gene function early in the B cell lineage in mb1-cre mice. *Proc. Natl. Acad. Sci. U.S.A.* 103, 13789-13794.
- Kraus M., Alimzhanov, M.B., Rajewsky, N., and Rajewsky, K. (2004). Survival of resting mature B lymphocytes depends on BCR signaling via the Igalphabeta heterodimer. *Cell* 117, 787-800.

**Table S5:** *Retroviral vector and lentiviral vector systems used*

| <b>Construct</b>                            | <b>Overexpression of</b>   | <b>Purpose</b>                                             |
|---------------------------------------------|----------------------------|------------------------------------------------------------|
| <b><u>Constitutive expression</u></b>       |                            |                                                            |
| MSCV BCR-ABL1 (p210)-Neo                    | BCR-ABL1                   | Leukemic transformation ( <i>Ph</i> <sup>+</sup> ALL, CML) |
| pQCXI-LUC-BLAST (retroviral)                | Firefly-Luciferase         | Luciferase bioimaging                                      |
| pMIG                                        | GFP                        | Empty vector control                                       |
| pMIG-Cre-GFP                                | Cre; GFP                   | Cre-mediated deletion of target genes                      |
| <sup>a</sup> pCLIP-hCMV-gRNA-RFP            | gRNA for target gene; RFP  | CRISPR/Cas9-mediated deletion of target gene               |
| <sup>a</sup> pCLIP-hCMV-Cas9-Nuclease-Blast | Cas9 nuclease              | CRISPR/Cas9-mediated deletion of target gene               |
| pCL6-hCMV-dCas9-VPR-Blast                   | dCas9-VPR                  | CRISPR/dCas9-mediated transcriptional activation           |
| pCL6-hCMV-gRNA-dsRed                        | RNA for target gene; dsRed | CRISPR/dCas9-mediated transcriptional activation           |
| <b><u>Inducible expression</u></b>          |                            |                                                            |
| MSCV - ER <sup>T2</sup> -IRES-Puro          | Puromycin resistance       | Empty vector control                                       |
| MSCV - ER <sup>T2</sup> -IRES-GFP           | GFP                        | Empty vector control                                       |
| pRetroX-Tet3G                               | Tet-On                     | Regulator vector                                           |
| MSCV - Cre-ER <sup>T2</sup> -IRES-Puro      | Cre; Puromycin resistance  | Inducible activation of Cre                                |
| MSCV - Cre-ER <sup>T2</sup> -IRES-GFP       | Cre; GFP                   | Inducible activation of Cre                                |
| pRetroX-TRE3G-Puro                          | Tet-On                     | Empty vector control                                       |
| pRetroX-TRE3G-C/EBP $\alpha$ -Puro          | Tet-On; <i>Cebpa</i>       | Inducible expression of C/EBP $\alpha$                     |
| pRetroX-TRE3G-PAX5-Puro                     | Tet-On; <i>PAX5</i>        | Inducible expression of PAX5                               |
| pCL6-ER <sup>T2</sup> -IRES-GFP             | GFP                        | Empty vector control                                       |
| pCL6-PAX5-ER <sup>T2</sup> -IRES-GFP        | PAX5; GFP                  | Inducible activation of PAX5                               |
| pCL6-PAX5-ETV6-ER <sup>T2</sup> -IRES-GFP   | PAX5-ETV6; GFP             | Inducible activation of PAX5-ETV6                          |
| pLVX-EF1a-Tet3G                             | Tet-On                     | Regulator vector                                           |
| pLVX-TRE3G-GFP                              | Tet-On                     | Empty vector control                                       |
| pLVX-TRE3G-IKZF1-GFP                        | Tet-On; IKZF1              | Inducible expression of IKZF1 and GFP                      |
| pLVX-TRE3G-IK6-GFP                          | Tet-On; IK6                | Inducible expression of IK6 and GFP                        |

**Notes:** a. Vectors were purchased from Transomic Technologies Inc.

**Table S6:** *gRNA sequences for CRISPR-mediated gene editing*

*gRNA sequences for CRISPR/Cas9-mediated deletion*

*TXNIP:*

g-08:GCATGTTTCATTCTGATGGG g-50:CCTTTGAAGGATGTTCCCAG g-92:TACTCGTGTCAAAGCCGTT

*NR3C1:*

g-11:CTTTAAGTCTGTTTCCCCCG g-53:TTAGTGTCCGGTAAAATGAG g-95:GTCATTCCACCAATTCCCGT

*CNR2:*

g-37:GCAGAGGTATCGGTCAATGG g-79:GAGCACAGCCACGTTCTCCA g-21:GCTAAGTGCCCTGGAGAACG

Non-targeting (NT):

GGAGCGCACCATCTTCTTCA

**Table S6, continued:** *gRNA sequences for CRISPR/dCas9-mediated activation*

*GLUT1:*

AGTGCACCGAAGTCACCCAG TAGTAACAGTACCACCTCGT TTAGAACAGCGTCTACTGCA

*GLUT3:*

TGTCTGTGGGGCGGGGGCGG ATTAGAAGAGGGAAGGAGTA GTGGAGAGAGTGGAAGGATG

*GLUT6:*

GGATGCGGACCCGGCTTCCC TCCCAGGGCGGAGCCCCTGC TCTTGGGGCGTGACCTTCGG

*INSR:*

CGCCAGCTACAAATACTGAG GGCCCCGAGATCCTGGGACG GGTCGGGGCCACCACCGCAA

*HK2:*

ACTTCAGCGTCCCAAATAGC TGGGAGGACTGCTTGAGCCC TTGAGGACGTGCATTTAGAA

*HK3:*

ACTCTTAGGGCAGGCTTGGA ATTAGCTGATGTTTGGTAAG GCAAGATGATTACCGCGAAG

*PFKL:*

CCTCGAGACCACCGGGGTGG GGGGGGGGTCTCACTGCTCA TAAACCTGTGCAATGTCACG

*PGAM1:*

AGCGCGCCCCCTCCTGTCCG CAGAGCGAGTGGAAGATTT TCGCTGCATCCTGGCGCTG

*FBP1:*

TTCCGTTTTATGATTTTGG CTCCACCCGCACTGTGGAG CCTCCACCCGCACTGTGGAG

*PYGL:*

CTCTGGGGCCGCGAGTGGGCT GGCGAGACCCCTGCCAGCCC GGGAGACGAGGTCCAAGCGC

*G6PD:*

ACCCGTGCCCGCCGGAATTG GGCGGGGAAACCGGACAGTA GGGGATTCGGGAGCACTACG

*INSRR:*

CACTGTCAGCTGGCGCTGGG CCGCGCGCCCGGAGGGATCC CTCCGCAGGGAGAGTCTCCC

*IGF2BP2:*

ACTCGGCGCGGCTGCCTCCT CTCCGCCTCTGCCCCCGGGC GGGCAGAGTCCCAGGGCCGGG

ACC (NM\_198836):

CTCCATGAGGTGACTACGTC GCGCGGGCCCGAGGGCTCAG TGAACGGCCTGGAGTAACCC

ACC (NM\_198837):

ATACCAATTATCAGACTGCA CCAGAGGGAGGAGCACAGCT GTGGGGAAAAGCAGGTCAGG

ACC (NM\_198839):

CGGAGCGCGAGCCCCTCTAG GGTGAGGCGCCAGGCAGCGC TGGCGCGGATTAGGGGGTCT

Non-targeting:

AAGATGAAAGGAAAGGCGTT

**Table S7:** *Antibodies used in this study**Mouse cells, flow cytometry*

| Surface antigen            | Manufacturer   |
|----------------------------|----------------|
| CD19-APC                   | Biolegend      |
| CD19-FITC                  | BD Biosciences |
| CD19-PerCP-Cy5.5           | Biolegend      |
| CD19-PE                    | Biolegend      |
| B220-PE                    | BD Biosciences |
| B220-PEcy7                 | Biolegend      |
| B220-AF700                 | Biolegend      |
| CD13-PE                    | BD Biosciences |
| CD43-APC                   | Biolegend      |
| c-Kit-FITC                 | BD Biosciences |
| CD11b (Mac1)-PE            | BD Biosciences |
| CD127 (IL-7Ra)-PE          | eBioscience    |
| CD2-PE                     | Biolegend      |
| Sca-1-PE                   | BD Biosciences |
| Sca-1-FITC                 | BD Biosciences |
| IgM-PerCP-Cy5.5            | Biolegend      |
| IgD-APCcy7                 | Biolegend      |
| Ig $\kappa$ light chain-PE | BC Biosciences |
| TruStain fcX Fc block      | Biolegend      |

*Human cells, flow cytometry*

| Surface antigen       | Manufacturer   |
|-----------------------|----------------|
| CD19-PerCP-Cy5.5      | Biolegend      |
| CD22-PE               | BD Biosciences |
| CD33-PE               | BD Biosciences |
| CD11b (Mac1)-PE       | Biolegend      |
| CD10-PE               | BD Biosciences |
| TruStain fcX Fc block | Biolegend      |

**Table S7, continued** *Antibodies used for Western blots*

| Antigen                             | Clone                 | Manufacturer              |
|-------------------------------------|-----------------------|---------------------------|
| $\beta$ -actin                      | Monoclonal (sc-47778) | Santa Cruz Biotechnology  |
| LKB1                                | Monoclonal (3047)     | Cell Signaling Technology |
| p-LKB1-S <sup>428</sup>             | Monoclonal (3482)     | Cell Signaling Technology |
| AMPK $\alpha$                       | Polyclonal (2532)     | Cell Signaling Technology |
| AMPK $\alpha$ 2                     | Polyclonal (2757)     | Cell Signaling Technology |
| p-AMPK $\alpha$ (T <sup>172</sup> ) | Monoclonal (2535)     | Cell Signaling Technology |
| ACC                                 | Monoclonal (3676)     | Cell Signaling Technology |
| p-ACC (S <sup>79</sup> )            | Monoclonal (11818)    | Cell Signaling Technology |
| S6                                  | Monoclonal (2217)     | Cell Signaling Technology |
| p-S6 (S235/236)                     | Monoclonal (4856)     | Cell Signaling Technology |
| p70 S6 kinase                       | Polyclonal (9202)     | Cell Signaling Technology |
| p-p70 S6 kinase (T389)              | Polyclonal (9205)     | Cell Signaling Technology |
| p27                                 | Polyclonal (sc-528)   | Santa Cruz Biotechnology  |

|                                |                         |                           |
|--------------------------------|-------------------------|---------------------------|
| p53                            | Monoclonal (2524)       | Cell Signaling Technology |
| p19ARF (mouse)                 | Polyclonal (ab80)       | Abcam                     |
| PTEN                           | Monoclonal (sc-393186)  | Santa Cruz Biotechnology  |
| Akt                            | Polyclonal (9272)       | Cell Signaling Technology |
| p-Akt (S473)                   | Polyclonal (9271)       | Cell Signaling Technology |
| Pax5                           | Monoclonal (8970)       | Cell Signaling Technology |
| Pax5                           | Polyclonal (AB4227)     | EMD Millipore             |
| C/EBP $\alpha$                 | Monoclonal (8178)       | Cell Signaling Technology |
| Glut1                          | Monoclonal (12939)      | Cell Signaling Technology |
| Glut3                          | Monoclonal (sc-74399)   | Santa Cruz Biotechnology  |
| Glut6 (mouse)                  | Polyclonal (sc-134538)  | Santa Cruz Biotechnology  |
| Glut6 (human)                  | Polyclonal (SAB2102200) | Sigma-Aldrich             |
| PFKL                           | Polyclonal (8175)       | Cell Signaling Technology |
| PGAM1                          | Monoclonal (12098)      | Cell Signaling Technology |
| PYGL                           | Polyclonal (SAB1411168) | Sigma-Aldrich             |
| PYGL                           | Polyclonal (15851-1-AP) | Proteintech               |
| G6PD                           | Polyclonal (8866)       | Cell Signaling Technology |
| Insulin receptor $\beta$       | Monoclonal (3025)       | Cell Signaling Technology |
| FoxO1                          | Monoclonal (2880)       | Cell Signaling Technology |
| Hexokinase III (HK3)           | Polyclonal (sc-28890)   | Santa Cruz Biotechnology  |
| Glucocorticoid receptor, NR3C1 | Polyclonal (sc-1004)    | Santa Cruz Biotechnology  |
| TXNIP                          | Monoclonal (14715)      | Cell Signaling Technology |
| CB2 (CNR2)                     | Polyclonal (sc-25494)   | Santa Cruz Biotechnology  |
| Insulin receptor $\alpha$      | Polyclonal (sc-710)     | Santa Cruz Biotechnology  |
| Hexokinase II (HK2)            | Polyclonal (2867)       | Cell Signaling Technology |
| ULK1                           | Monoclonal (8054)       | Cell Signaling Technology |
| p-ULK1 (S555)                  | Monoclonal (5869)       | Cell Signaling Technology |
| Raptor                         | Monoclonal (2280)       | Cell Signaling Technology |
| p-Raptor (S792)                | Polyclonal (2083)       | Cell Signaling Technology |
| IKAROS (IKZF1)                 | Polyclonal (sc-13039)   | Santa Cruz Biotechnology  |
| Phospho-tyrosine (P-Tyr-100)   | Monoclonal (9411)       | Cell Signaling Technology |
| c-Abl (Ab-3)                   | Monoclonal (OP 20)      | Calbiochem                |
| p-c-Abl1 (Y412)                | Monoclonal (2865)       | Cell Signaling Technology |

**Table S7, continued** *Antibodies used for single-locus quantitative ChIP*

| <b>Antigen</b>  | <b>Clone ID</b>      | <b>Manufacturer</b>      |
|-----------------|----------------------|--------------------------|
| Pax-5 (C-20)    | Polyclonal (sc-1974) | Santa Cruz Biotechnology |
| Normal goat IgG | sc-2028              | Santa Cruz Biotechnology |

**Table S8:** Sequences of oligonucleotide primers used

*PCR primers for qChIP*

|                                                      |                             |
|------------------------------------------------------|-----------------------------|
| <i>GLUT1</i> promoter:<br>5'-ACTCCCACTGCGACTCTGAC-3' | 5'-AGGCAAGAGGTAGCAACAGC-3'  |
| <i>G6PD</i> promoter:<br>5'-ACAGCTATGACACCGGAAGC-3'  | 5'-AAAGGACCACACCTGTCAGC-3'  |
| <i>INSR</i> promoter:<br>5'-CTCGGGCCCGTAAACAAC-3'    | 5'-AAGCTTTCCTCCCTCTCCT-3'   |
| <i>CEBPA</i> promoter:<br>5'-TATAAAGCTGGGCCGGCGC-3'  | 5'-TAGAGTTCTCCCGGCATGGC-3'  |
| <i>TXNIP</i> promoter:<br>5'-CCCCTCTTTTTCTCCAAAGG-3' | 5'-ACGCCGCTGGTTACTACTAAG-3' |
| <i>NR3C1</i> promoter:<br>5'-AGAAGCGTGTGCAATTTCC-3'  | 5'-GCTTTCACCCCATTCAAAAG-3'  |
| <i>CNR2</i> promoter:<br>5'-CCACTCAGAGCACCTGTTGA-3'  | 5'-ACCTGGAGGGGAAGTGGTAA-3'  |
| <i>LKB1</i> promoter:<br>5'-GTCTCCGAGGACCAATGAGC-3'  | 5'-CTGACGATTGGAGCGTTTG-3'   |
| <i>CD19</i> promoter:<br>5'-ACCACCGCCTTCTCTCTG-3'    | 5'-TGGCATGGTGGTCAGACTCT-3'  |
| <i>ACTA1</i> promoter:<br>5'-AGAGTCAGAGCAGCAGGTAG3'  | 5'-CAAGGCTCAATAGCTTTCTT-3'  |

*PCR primers for genotyping*

|                                                              |                               |
|--------------------------------------------------------------|-------------------------------|
| <i>Cd21-Cre</i><br>5'-GCGGTCTGGCAGTAAAACTATC-3'              | 5'-GTGAAACAGCATTGCTGTCACTT-3' |
| <i>Mb1</i> wild-type<br>5'-TTCAGCCTTCAGTCTAACATC-3'          | 5'-ATCTGTGAAGACAGGGTGC-3'     |
| <i>Mb1-Cre</i><br>5'-CCCTGTGGATGCCACCTC-3'                   | 5'-GTCCTGGCATCTGTCAGAG-3'     |
| <i>Lkb1<sup>fl/fl</sup></i><br>5'-ATCGGAATGTGATCCAGCTT-3'    |                               |
| 5'-ACGTAGGCTGTGCAACCTCT-3'                                   |                               |
| 5'-CTGTGCTGCCTAATCTGTGC-3'                                   |                               |
| <i>Ampka2<sup>fl/fl</sup></i><br>5'-GCAGGCCGAATTTCTGAGTTC-3' |                               |
| 5'-ACCACCTGCCTAGTGCTGAC-3'                                   |                               |
| 5'-ACACCCGAGAGGAAACACAC-3'                                   |                               |

**Table S9:** *Summary of accession numbers for gene expression data*

| GEO ID   | Description                                                                                                                                                                                                                                                                                                                                                                                                                          | Figure                                    |
|----------|--------------------------------------------------------------------------------------------------------------------------------------------------------------------------------------------------------------------------------------------------------------------------------------------------------------------------------------------------------------------------------------------------------------------------------------|-------------------------------------------|
| GSE32330 | Gene expression from C/EBP $\alpha$ -induced transdifferentiation of pre-B cells into macrophages (the myeloid lineage); Data from DiTullio et al., 2011.                                                                                                                                                                                                                                                                            | Extended Data Fig. 3                      |
| GSE52870 | Expression profiling of Pax5 restoration in murine B-progenitor ALL by high throughput sequencing; Data from Liu et al., 2014.                                                                                                                                                                                                                                                                                                       | Extended Data Fig. 1a                     |
| GSE38463 | Expression profiling of wild-type mouse B cell precursor populations from common lymphoid progenitor through to Hardy fraction F; Data from Holmfeldt et al., 2013. Gene expression data revealed that while expression of the $\alpha$ 1-form peaked at later stages of B cell development, expression of both Lkb1 and the $\alpha$ 2-form of Ampk shared similar patterns and was higher in pre-B cells compared to later stages. | Extended Data Fig. 4b (stated in legends) |

**Table S10:** *Summary of clinical trial data used in this study*

| Clinical trial | Malignancy | N=  | GEO ID   | Publication                            |
|----------------|------------|-----|----------|----------------------------------------|
| COG P9906      | ALL        | 207 | GSE11877 | Kang et al., 2010; Harvey et al., 2010 |

**References:**

Harvey, R.C., Mullighan, C.G., Wang, X., Dobbin, K.K., Davidson, G.S., Bedrick, E.J. et al. Identification of novel cluster groups in pediatric high-risk B-precursor acute lymphoblastic leukemia with gene expression profiling: correlation with genome-wide DNA copy number alterations, clinical characteristics, and outcome. *Blood* **116**, 4874-4884 (2010).

Kang, H., Chen, I.M., Wilson, C.S., Bedrick, E.J., Harvey, R.C., Atlas S.R., et al. Gene expression classifiers for relapse-free survival and minimal residual disease improve risk classification and outcome prediction in pediatric B-precursor acute lymphoblastic leukemia. *Blood* **115**, 1394-1405 (2010).
